# Supplementary material for: Diversity and Functional Analysis of the FeMo-Cofactor Maturase NifB
Source: Front Plant Sci. 2017 Nov 14;8:1947. doi: 10.3389/fpls.2017.01947 (PMC5715403; doi:10.3389/fpls.2017.01947)
Supplement: Supplementary file 2 [file Data_Sheet_1.XLSX]

## Sheet: Table 1
Supplementary Table 1. Structure and Function Linkage Database (SFLD) of SAM-radical proteins that insert a carbon into the nitrogenase M-cluster (NifB).
SFLD (http://sfld.rbvi.ucsf.edu/django/)				Subgroup ID: 1068
Subgroup ID: 1068 (http://sfld.rbvi.ucsf.edu/django/subgroup/1068/)				Subgroup: FeMo cofactor biosynthesis protein							Discarded:	These sequences lacked at least one of the following consensus motifs (HPC, Cx3Cx2C, ExPR, AGPG, TxTxN and Cx2CRxDAxG).
Total Num. Sequences: 390				Reaction ID: 260
				Reaction name: Carbon Insertion into the Nitrogenase M-Cluster
				Taxonomic Lineage								NifB Domain Architecture
SFLD id	Superfamily	Type of life	Species	Taxon ids	Phylum	Class	Uniprot acc num	Length (AA)	Mw	pI	Discarded	NifN-like	SAM-radical	NifX-like
280102	Radical SAM	Archaea	Methanocaldococcus jannaschii DSM 2661	243232	Euryarchaeota	Methanococci	Q58493	300	34567.7	8.89
381033	Radical SAM	Bacteria	Bradyrhizobium japonicum USDA 110	224911	Proteobacteria	Alphaproteobacteria	P06770	499	54897.1	8.61
381034	Radical SAM							521			x
381035	Radical SAM	Bacteria	Rhizobium leguminosarum bv. trifolii	386	Proteobacteria	Alphaproteobacteria	P24427	490	53926.5	7.58
381036	Radical SAM	Synthetic, Bacteria	Cloning vector SBa_000534, Klebsiella pneumoniae	1176378	Proteobacteria	Gammaproteobacteria	P10390	468	50856.1	6.24
381037	Radical SAM	Bacteria	Rhizobium leguminosarum	384	Proteobacteria	Alphaproteobacteria	P07748	359			x
381038	Radical SAM	Bacteria	Rhizobium sp. NGR234	394	Proteobacteria	Alphaproteobacteria	Q53205	493	53506.8	6.32
381039	Radical SAM	Bacteria	Rhodobacter capsulatus	1061	Proteobacteria	Alphaproteobacteria	P17434	452	49445.1	5.8
381040	Radical SAM	Bacteria	Azotobacter vinelandii	354	Proteobacteria	Gammaproteobacteria	P11067	502	54579.2	5.7
381041	Radical SAM	Bacteria	Anabaena variabilis	1172	Cyanobacteria		Q43883	475	52918.5	6.43
381043	Radical SAM	Bacteria	Herbaspirillum seropedicae	964	Proteobacteria	Betaproteobacteria	P27714	525	57440	5.81
381044	Radical SAM	Bacteria	Sinorhizobium meliloti 1021	266834	Proteobacteria	Alphaproteobacteria	P09824	490	54223.9	6.7
381045	Radical SAM	Bacteria	Nostoc sp. PCC 7120	103690	Cyanobacteria		P20627	475	52876.5	6.33
381046	Radical SAM	Bacteria	Frankia alni	1859	Actinobacteria	Actinobacteria	P46044	510	55078.5	5.17
385641	Radical SAM	Bacteria	Rhodomicrobium vannielii ATCC 17100	1069	Proteobacteria	Alphaproteobacteria	E3I3H6	519	56909.8	5.66
385653	Radical SAM	Bacteria	Gloeothece sp. KO68DGA	167942	Cyanobacteria		A2V895	490	54111.9	6.58
385663	Radical SAM	Bacteria	Novosphingobium nitrogenifigens DSM 19370	378548	Proteobacteria	Alphaproteobacteria	F1Z4T3	522	56437.2	5.69
385707	Radical SAM	Bacteria	Bradyrhizobium sp. ORS278	114615	Proteobacteria	Alphaproteobacteria	A4YYX1	520	56467.1	5.75
385780	Radical SAM	Bacteria	Klebsiella oxytoca KCTC 1686	571	Proteobacteria	Gammaproteobacteria	G8W9F3	468
385807	Radical SAM	Bacteria	Hydrogenobaculum sp. Y04AAS1	380749	Aquificae	Aquificae	B4U920	469	52756.4	5.9
385893	Radical SAM	Bacteria	Azospirillum amazonense Y2	28077	Proteobacteria	Alphaproteobacteria	G1XWD1	519	56264	6.07
386002	Radical SAM	Bacteria	Nostoc punctiforme PCC 73102	272131	Cyanobacteria		B2J6Z1	483	53714.5	6.59
386061	Radical SAM	Bacteria	Trichodesmium erythraeum IMS101	1206	Cyanobacteria		Q10X83	489	54097.2	6.83
386075	Radical SAM	Bacteria	Thiorhodospira sibirica ATCC 700588	154347	Proteobacteria	Gammaproteobacteria	G4E8L1	518	55290.3	6.02
412273	Radical SAM	Bacteria	Desulfurobacterium thermolithotrophum DSM 11699	64160	Aquificae	Aquificae	F0S0T8	322	36576.1	9.51
412274	Radical SAM	Bacteria	Klebsiella variicola At-22	244366	Proteobacteria	Gammaproteobacteria	D1KS27	468
412275	Radical SAM	Bacteria	Clostridium papyrosolvens DSM 2782	29362	Firmicutes	Clostridia	F1TH64	884			x
412276	Radical SAM	Bacteria	Mesorhizobium loti R7A	935547	Proteobacteria	Alphaproteobacteria	Q8KJ58	493	53666.2	7.21
412277	Radical SAM	Bacteria	Rhodopseudomonas palustris DX-1	1076	Proteobacteria	Alphaproteobacteria	E6VEV0	518	56146.1	5.97
412278	Radical SAM	Bacteria	Azoarcus sp. BH72	62928	Proteobacteria	Betaproteobacteria	A1K2T5	498	54093.7	5.22
412279	Radical SAM	Archaea	Methanotorris igneus Kol 5	2189	Euryarchaeota	Methanococci	F6BAP3	294	33675.6	8.69
412280	Radical SAM	Bacteria	Klebsiella sp. 1_1_55	469608	Proteobacteria	Gammaproteobacteria	D6GAU2	468
412281	Radical SAM	Archaea	Methanococcus maripaludis C7	39152	Euryarchaeota	Methanococci	A6VJW4	297	33427.7	6.36
412282	Radical SAM	Bacteria	Candidatus Azobacteroides pseudotrichonymphae genomovar. CFP2	511435	Bacteroidetes	Bacteroidia	B6YRJ3	419			x
412283	Radical SAM	Bacteria	Cyanothece sp. PCC 8801	43988	Cyanobacteria		B7JWX7	491	53976.7	6.73
412284	Radical SAM	Bacteria	Chlorobium phaeobacteroides BS1	1096	Chlorobi	Chlorobia	B3EL88	424			x
412285	Radical SAM	Bacteria	Pelodictyon phaeoclathratiforme BU-1	34090	Chlorobi	Chlorobia	B4SC66	423			x
412286	Radical SAM	Bacteria	Thermoanaerobacterium thermosaccharolyticum DSM 571	1517	Firmicutes	Clostridia	D9TS57	349	39273.6	9.37
412287	Radical SAM	Bacteria	Chlorobaculum parvum NCIB 8327	274539	Chlorobi	Chlorobia	B3QQ19	424	46676.6	5.57
412288	Radical SAM	Bacteria	Anaeromyxobacter sp. Fw109-5	404589	Proteobacteria	Deltaproteobacteria	A7HES5	495	52294.6	8.4
412289	Radical SAM	Bacteria	Desulfovibrio vulgaris str. 'Miyazaki F'	881	Proteobacteria	Deltaproteobacteria	B8DR83	427			x
412290	Radical SAM	Bacteria	Rhizobium leguminosarum bv. trifolii WSM2304	384	Proteobacteria	Alphaproteobacteria	B6A0Y0	363	40082.6	7.18
412291	Radical SAM	Bacteria	Bradyrhizobium sp. BTAi1	288000	Proteobacteria	Alphaproteobacteria	A5ENV2	520	56534.2	5.81
412292	Radical SAM	Bacteria	Treponema azotonutricium ZAS-9	150829	Spirochaetes	Spirochaetia	F5YEM2	306	32993.2	5.83
412293	Radical SAM	Bacteria	Clostridium thermocellum DSM 1313	1515	Firmicutes	Clostridia	C7HF06	291			x
412294	Radical SAM	Bacteria	Phascolarctobacterium sp. YIT 12068	626940	Firmicutes	Negativicutes	E8LBQ5	222			x
412295	Radical SAM	Bacteria	Campylobacter showae RM3277	204	Proteobacteria	Epsilonproteobacteria	C6RGS7	275	30496.4	9.03
412296	Radical SAM	Bacteria	Thiorhodococcus drewsii AZ1	210408	Proteobacteria	Gammaproteobacteria	G2E6G2	497	54242.1	6.27
412297	Radical SAM	Archaea	Methanobrevibacter ruminantium M1	83816	Euryarchaeota	Methanobacteria	D3DZ69	296	32316.3	6.13
412298	Radical SAM	Bacteria	Megasphaera micronuciformis F0359	187326	Firmicutes	Negativicutes	E2ZAI0	232			x
412299	Radical SAM	Bacteria	Candidatus Accumulibacter phosphatis clade IIA str. UW-1	327160	Proteobacteria	Betaproteobacteria	C7RRE1	505	54213.4	6.08
412300	Radical SAM	Bacteria	Clostridium ljungdahlii DSM 13528	1538	Firmicutes	Clostridia	D8GL53	423	47786.9	7.83
412301	Radical SAM	Bacteria	Acidithiobacillus ferrooxidans ATCC 53993	920	Proteobacteria	Acidithiobacillia	B5ER81	522	56781.2	5.69
412302	Radical SAM	Archaea	Methanocaldococcus vulcanius M7	73913	Euryarchaeota	Methanococci	C9RI91	300	34656.8	8.82
412303	Radical SAM	Bacteria	Desulfovibrio magneticus RS-1	184917	Proteobacteria	Deltaproteobacteria	C4XQ76	422			x
412304	Radical SAM	Bacteria	Caldicellulosiruptor kristjanssonii 177R1B	52765	Firmicutes	Clostridia	E4SAV8	266			x
412305	Radical SAM	Bacteria	Caldicellulosiruptor hydrothermalis 108	413888	Firmicutes	Clostridia	E4Q7K0	266			x
412306	Radical SAM	Bacteria	Caldicellulosiruptor lactoaceticus 6A	52766	Firmicutes	Clostridia	G2PWQ2	266			x
412307	Radical SAM	Bacteria	Ethanoligenens harbinense YUAN-3	253239	Firmicutes	Clostridia	E6U4U5	419			x
412308	Radical SAM	Bacteria	Clostridium cellulolyticum H10	1521	Firmicutes	Clostridia	B8I2G9	269			x
412309	Radical SAM	Bacteria	Marichromatium purpuratum 984	37487	Proteobacteria	Gammaproteobacteria	F9TXW1	497
412310	Radical SAM	Bacteria	Gluconacetobacter diazotrophicus PAl 5	33996	Proteobacteria	Alphaproteobacteria	A9H5T3	490	53741.8	5.44
412311	Radical SAM	Bacteria	Rhizobium etli CIAT 652	491916	Proteobacteria	Alphaproteobacteria	B3Q2S5	492	53683.2	6.29
412312	Radical SAM	Bacteria	Campylobacter concisus 13826	360104	Proteobacteria	Epsilonproteobacteria	A7ZEI0	275	30532.1	8.55
412313	Radical SAM	Bacteria	Arcobacter nitrofigilis DSM 7299	572480	Proteobacteria	Epsilonproteobacteria	D5V3N9	482	53471.6	5.18
412314	Radical SAM	Bacteria	Pantoea sp. At-9b	592316	Proteobacteria	Gammaproteobacteria	D1KS47	467	51065.2	6.02
412315	Radical SAM	Bacteria	Thiocapsa marina 5811	768671	Proteobacteria	Gammaproteobacteria	F9UCV2	503	54108.7	6
412316	Radical SAM	Archaea	Methanobacterium sp. AL-21	868132	Euryarchaeota	Methanobacteria	F0TAR5	283	31551.5	6.22
412317	Radical SAM	Bacteria	Pectobacterium atrosepticum SCRI1043	218491	Proteobacteria	Gammaproteobacteria	Q6D307	468	51191.5	5.95
412318	Radical SAM	Archaea	Methanococcus maripaludis C6	444158	Euryarchaeota	Methanococci	A9A7C6	297	33481.9	6.64
412319	Radical SAM	Bacteria	Sulfuricurvum kujiense DSM 16994	709032	Proteobacteria	Epsilonproteobacteria	E4TZR5	471	52251.5	5.42
412320	Radical SAM	Bacteria	Rhodobacter sphaeroides ATCC 17029	349101	Proteobacteria	Alphaproteobacteria	A3PLT4	491	52892.1	5.72
412321	Radical SAM	Bacteria	Geobacter bemidjiensis Bem	225194	Proteobacteria	Deltaproteobacteria	B5ECR1	285	31269.4	8.48
412322	Radical SAM	Bacteria	Spirochaeta smaragdinae DSM 11293	573413	Spirochaetes	Spirochaetia	E1R3Y2	421			x
412323	Radical SAM	Bacteria	Roseiflexus sp. RS-1	357808	Chloroflexi	Chloroflexia	A5USK4	313	34383.5	8.67
412324	Radical SAM	Bacteria	Rhodopseudomonas palustris TIE-1	395960	Proteobacteria	Alphaproteobacteria	B3QIR1	296			x
412325	Radical SAM	Bacteria	Dickeya dadantii Ech703	579405	Proteobacteria	Gammaproteobacteria	C6C8V3	468	51348.4	6.17
412326	Radical SAM	Bacteria	Syntrophobotulus glycolicus DSM 8271	645991	Firmicutes	Clostridia	F0SYG8	296	32723.7	7.98
412327	Radical SAM	Bacteria	Acidithiobacillus ferrivorans SS3	743299	Proteobacteria	Acidithiobacillia	G0JSZ3	522	56716.1	5.56
412328	Radical SAM	Bacteria	Desulfobacca acetoxidans DSM 11109	880072	Proteobacteria	Deltaproteobacteria	F2NEQ9	422			x
412329	Radical SAM	Bacteria	Desulfovibrio vulgaris str. 'Miyazaki F'	883	Proteobacteria	Deltaproteobacteria	B8DR79	419			x
412330	Radical SAM	Bacteria	Desulfovibrio sp. ND132	641491	Proteobacteria	Deltaproteobacteria	F0JD05	422			x
412331	Radical SAM	Bacteria	Candidatus Desulforudis audaxviator MP104C	477974	Firmicutes	Clostridia	B1I0Z4	285			x
412332	Radical SAM	Bacteria	Desulfovibrio africanus str. Walvis Bay	690850	Proteobacteria	Deltaproteobacteria	F3YUU4	377			x
412333	Radical SAM	Bacteria	Cyanothece sp. PCC 7424	65393	Cyanobacteria		B7KG80	483	53672.3	6.58
412334	Radical SAM	Bacteria	Geobacter sp. FRC-32	316067	Proteobacteria	Deltaproteobacteria	B9M029	291	31405.1	6.66
412335	Radical SAM	Bacteria	Pantoea agglomerans	549	Proteobacteria	Gammaproteobacteria	Q57037	465	50125.1	5.87
412336	Radical SAM	Bacteria	Desulfovibrio sp. A2	298701	Proteobacteria	Deltaproteobacteria	G2HBA1	427			x
412337	Radical SAM	Bacteria	Clostridium acetobutylicum ATCC 824	991791	Firmicutes	Clostridia	Q97MD9	882	98651.6	8.17
412338	Radical SAM	Bacteria	Rhodospirillum rubrum ATCC 11170	269796	Proteobacteria	Alphaproteobacteria	Q2RVQ0	503	54487.1	6.1
412339	Radical SAM	Bacteria	Burkholderia vietnamiensis G4	269482	Proteobacteria	Betaproteobacteria	A4JRL6	530	57365.9	5.62
412340	Radical SAM	Bacteria	Rhodobacter sp. SW2	371731	Proteobacteria	Alphaproteobacteria	C8S0U0	486	52519.4	5.6
412341	Radical SAM	Bacteria	Sideroxydans lithotrophicus ES-1	580332	Proteobacteria	Betaproteobacteria	D5CPD5	501	54864.6	5.63
412342	Radical SAM	Bacteria	Desulfosporosinus sp. OT	913865	Firmicutes	Clostridia	G2FSQ1	278	29932.9	8.68
412343	Radical SAM	Archaea	Methanosarcina barkeri str. Fusaro	269797	Euryarchaeota	Methanomicrobia	Q46G74	321	36103.6	5.9
412344	Radical SAM	Bacteria	Nodularia spumigena CCY9414	313624	Cyanobacteria		A0ZAX0	445	53499.8	5.74
412345	Radical SAM	Bacteria	Mesorhizobium australicum WSM2073	68287	Proteobacteria	Alphaproteobacteria	F7Y557	493	53499.8	5.74
412346	Radical SAM	Bacteria	Clostridium ljungdahlii DSM 13528	748727	Firmicutes	Clostridia	D8GMG8	895	100496	8.15
412347	Radical SAM	Bacteria	Geobacter sp. M18	443143	Proteobacteria	Deltaproteobacteria	E8WHN4	285	31124.2	7.1
412348	Radical SAM	Bacteria	Clostridium beijerinckii NCIMB 8052	290402	Firmicutes	Clostridia	A6LUZ5	896			x
412349	Radical SAM	Bacteria	Methylomonas methanica MC09	857087	Proteobacteria	Gammaproteobacteria	G0A0V5	497	54634	5.2
412350	Radical SAM	Bacteria	Gluconacetobacter diazotrophicus PAl 5	272568	Proteobacteria	Alphaproteobacteria	Q9F1E1	490	53699.8	5.44
412351	Radical SAM	Archaea	Methanosphaera stadtmanae DSM 3091	339860	Euryarchaeota	Methanobacteria	Q2NFJ5	291	32224.6	8.59
412352	Radical SAM	Bacteria	delta proteobacterium NaphS2	88274	Proteobacteria	Deltaproteobacteria	D8EZD5	420			x
412353	Radical SAM	Archaea	Methanothermococcus okinawensis IH1	647113	Euryarchaeota	Methanococci	F8ANM0	299	34224.1	8.19
412354	Radical SAM	Bacteria	Rhizobium leguminosarum	384	Proteobacteria	Alphaproteobacteria	Q52836	189			x
412355	Radical SAM	Bacteria	Frankia alni ACN14a	326424	Actinobacteria	Actinobacteria	Q0RAW4	470	51510.6	5.08
412356	Radical SAM	Bacteria	Zymomonas mobilis subsp. mobilis ZM4	264203	Proteobacteria	Alphaproteobacteria	Q5NLG9	489	54718.5	6.09
412357	Radical SAM	Bacteria	Azotobacter vinelandii DJ	354	Proteobacteria	Gammaproteobacteria	C1DMB1	503	54732.5	5.84
412358	Radical SAM	Bacteria	Desulfovibrio sp. A2	298701	Proteobacteria	Deltaproteobacteria	G2HCH1	306	30988.8	8.35
412359	Radical SAM	Bacteria	Verrucomicrobiae bacterium DG1235	382464	Verrucomicrobia	Verrucomicrobiae	B5JMT4	438			x
412360	Radical SAM	Archaea	Methanocaldococcus infernus ME	67760	Euryarchaeota	Methanococci	D5VRM1	302	35022.4	9.02
412361	Radical SAM	Bacteria	Rhodopseudomonas palustris CGA009	258594	Proteobacteria	Alphaproteobacteria	Q6N6I1	298			x
412362	Radical SAM	Bacteria	Rhodospirillum rubrum ATCC 11170	269796	Proteobacteria	Alphaproteobacteria	G2TBP3	331			x
412363	Radical SAM	Bacteria	Desulfotomaculum nigrificans DSM 574	696369	Firmicutes	Clostridia	F0DNT9	280			x
412364	Radical SAM	Bacteria	Fibrobacter succinogenes	833	Fibrobacteres	Fibrobacteria	C9RQ04	290			x
412365	Radical SAM	Bacteria	Rhodobacter sphaeroides 2.4.1	1063	Proteobacteria	Alphaproteobacteria	Q3J0G6	491	52838	5.72
412366	Radical SAM	Bacteria	Sinorhizobium meliloti AK83	382	Proteobacteria	Alphaproteobacteria	F6EB47	490
412367	Radical SAM	Bacteria	Desulfarculus baarsii DSM 2075	453230	Proteobacteria	Deltaproteobacteria	E1QE22	428			x
412368	Radical SAM	Bacteria	Synechococcus sp. PCC 7335	91464	Cyanobacteria		B4WRV7	397			x
412369	Radical SAM	Bacteria	Clostridium lentocellum DSM 5427	29360	Firmicutes	Clostridia	F2JLB1	897			x
412370	Radical SAM	Bacteria	Tolumonas auensis DSM 9187	43948	Proteobacteria	Gammaproteobacteria	C4LAM9	476	52031.8	5.98
412371	Radical SAM	Archaea	Methanosarcina mazei	2209	Euryarchaeota	Methanomicrobia	Q8PYU2	335	37767.2	5.55
412372	Radical SAM	Archaea	Methanocorpusculum labreanum Z	83984	Euryarchaeota	Methanomicrobia	A2SR95	310	34567.8	6.75
412373	Radical SAM	Bacteria	Frankia sp. CcI6	1352929	Actinobacteria	Actinobacteria (high G+C Gram-positive bacteria)	Q2J4G8	527	57011.7	5.51
412374	Radical SAM	Archaea	Methanosarcina acetivorans C2A	188937	Euryarchaeota	Methanomicrobia	Q8TIF7	323	36187.9	5.78
412375	Radical SAM	Bacteria	Magnetospirillum gryphiswaldense MSR-1	431944	Proteobacteria	Alphaproteobacteria	A4TZU0	490	53496.4	5.69
412376	Radical SAM	Bacteria	Cyanothece sp. ATCC 51142	43988	Cyanobacteria		A1KYD1	490	54242	6.68
412377	Radical SAM	Bacteria	Chlorobium tepidum TLS	194439	Chlorobi	Chlorobia	Q8KC85	424			x
412378	Radical SAM	Bacteria	Clostridium kluyveri NBRC 12016	583346	Firmicutes	Clostridia	B9E2E8	451	50784.7	7.14
412379	Radical SAM	Bacteria	Halorhodospira halophila SL1	349124	Proteobacteria	Gammaproteobacteria	A1WTR3	351	37621.6	5.75
412380	Radical SAM	Bacteria	Syntrophobotulus glycolicus DSM 8271	645991	Firmicutes	Clostridia	F0SYJ2	299	33489.6	6.79
412381	Radical SAM	Bacteria	Rhizobium leguminosarum bv. viciae	387	Proteobacteria	Alphaproteobacteria	D3GDK0	497	54139	7
412382	Radical SAM	Bacteria	Desulfobacterium autotrophicum HRM2	177437	Proteobacteria	Deltaproteobacteria	C0QGQ4	411			x
412383	Radical SAM	Bacteria	Clostridium thermocellum ATCC 27405	203119	Firmicutes	Clostridia	A3DFR5	291			x
412384	Radical SAM	Bacteria	Mesorhizobium loti	381	Proteobacteria	Alphaproteobacteria	Q98AT9	493	53569.1	7.21
412385	Radical SAM	Bacteria	Dechloromonas aromatica RCB	159087	Proteobacteria	Betaproteobacteria	Q47G28	500	54385.2	5.28
412386	Radical SAM	Archaea	Candidatus Methanoregula boonei	456442	Euryarchaeota	Methanomicrobia	A7I622	297	33390.9	8.34
412387	Radical SAM	Bacteria	Desulfurivibrio alkaliphilus AHT2	589865	Proteobacteria	Deltaproteobacteria	D6Z0A8	424			x
412388	Radical SAM	Bacteria	Desulfobacterium autotrophicum HRM2	177437	Proteobacteria	Deltaproteobacteria	C0QKL5	424			x
412389	Radical SAM	Bacteria	Desulfurispirillum indicum	936456	Chrysiogenetes	Chrysiogenetes	E6W2X1	308	34041.3	7.57
412390	Radical SAM	Bacteria	Chlorobium phaeobacteroides DSM 266	290317	Chlorobi	Chlorobia	A1BEG4	423			x
412391	Radical SAM	Bacteria	Rhodobacter sphaeroides WS8N	992186	Proteobacteria	Alphaproteobacteria	F5M4C1	491
412392	Radical SAM	Bacteria	Geobacter sulfurreducens PCA	243231	Proteobacteria	Deltaproteobacteria	Q749E4	290	31245.3	7.17
412393	Radical SAM	Bacteria	Clostridium cellulovorans	1493	Firmicutes	Clostridia	D9SS79	885	98612	6.1
412394	Radical SAM	Bacteria	Rhodospirillum centenum	34018	Proteobacteria	Alphaproteobacteria	B6IXL5	492	52330.4	6.03
412395	Radical SAM	Bacteria	Desulfovibrio desulfuricans	876	Proteobacteria	Deltaproteobacteria	B8IY89	296			x
412396	Radical SAM	Bacteria	Clostridium kluyveri DSM 555	431943	Firmicutes	Clostridia	A5N1T7	890	99264.4	8.05
412397	Radical SAM	Bacteria	Geobacter sp. M21	443144	Proteobacteria	Deltaproteobacteria	C6E992	285	31048.3	8.33
412398	Radical SAM	Bacteria	Sinorhizobium meliloti	382	Proteobacteria	Alphaproteobacteria	F6BZ98	490
412399	Radical SAM	Bacteria	Desulfovibrio vulgaris	881	Proteobacteria	Deltaproteobacteria	E3IT28	514			x
412400	Radical SAM	Bacteria	Chloroherpeton thalassium ATCC 35110	100716	Chlorobi	Chlorobia	B3QXW4	423			x
412401	Radical SAM	Bacteria	Cyanobacterium UCYN-A	713887	Cyanobacteria		B7TB39	491	54523.1	6.32
412402	Radical SAM	Bacteria	Zymomonas mobilis subsp. pomaceae ATCC 29192	579138	Proteobacteria	Alphaproteobacteria	F8EUR1	490	54075.4	5.65
412403	Radical SAM	Bacteria	Chlorobium limicola DSM 245	290315	Chlorobi	Chlorobia	B3EH81	424			x
412404	Radical SAM	Archaea	Methanohalobium evestigatum	2322	Euryarchaeota	Methanomicrobia	D7E943	315	35639.8	5.19
412405	Radical SAM	Bacteria	Pseudomonas stutzeri	316	Proteobacteria	Gammaproteobacteria	Q93JV6	504	54566	5.27
412406	Radical SAM	Bacteria	Methylobacterium nodulans	114616	Proteobacteria	Alphaproteobacteria	B8ITH4	498	54272	6.14
412407	Radical SAM	Bacteria	Thermincola potens	863643	Firmicutes	Clostridia	D5XC16	428	47626.9	7.86
412408	Radical SAM	Bacteria	Geobacter daltonii	1203471	Proteobacteria	Deltaproteobacteria	B9M0T8	286	30942.9	8.04
412409	Radical SAM	Bacteria	Magnetospirillum magneticum	84159	Proteobacteria	Alphaproteobacteria	Q2W6Y8	498	53974.3	5.92
412410	Radical SAM	Bacteria	Geobacter lovleyi	313985	Proteobacteria	Deltaproteobacteria	B3E297	273	29751.5	8.08
412411	Radical SAM	Bacteria	Anabaena variabilis ATCC 29413	240292	Cyanobacteria		Q44481	484	53950.9	6.58
412412	Radical SAM	Bacteria	Syntrophobacter fumaroxidans	119484	Proteobacteria	Deltaproteobacteria	A0LH03	423			x
412413	Radical SAM	Bacteria	Thermodesulfovibrio yellowstonii DSM 11347	289376	Nitrospirae	Nitrospira	B5YH11	293	33219.5	7.94
412414	Radical SAM	Bacteria	Pseudomonas stutzeri	316	Proteobacteria	Gammaproteobacteria	A4VJ50	447			x
412415	Radical SAM	Archaea	Methanocella paludicola	570267	Euryarchaeota	Methanomicrobia	D1YZZ3	298	32757.8	7.56
412416	Radical SAM	Bacteria	Syntrophothermus lipocalidus DSM 12680	643648	Firmicutes	Clostridia	D7CIY9	271	29884.7	6.82
412417	Radical SAM	Bacteria	Caldicellulosiruptor saccharolyticus DSM 8903	351627	Firmicutes	Clostridia	A4XMA2	267			x
412418	Radical SAM	Bacteria	Acidithiobacillus ferrooxidans ATCC 23270	243159	Proteobacteria	Acidithiobacillia	B7JAA6	499	54426.6	5.89
412419	Radical SAM	Bacteria	Frankia sp. EUN1f	102897	Actinobacteria	Actinobacteria (high G+C Gram-positive bacteria)	D3CZR2	672	67649.4	4.91
412420	Radical SAM	Bacteria	Azospirillum lipoferum	193	Proteobacteria	Alphaproteobacteria	D3NWV6	521	56074.6	5.48
412421	Radical SAM	Bacteria	Rhodopseudomonas palustris	1076	Proteobacteria	Alphaproteobacteria	B3QG74	307			x
412422	Radical SAM	Bacteria	Desulfovibrio sp. A2	298701	Proteobacteria	Deltaproteobacteria	G2HB97	445			x
412423	Radical SAM	Archaea	Methanococcoides burtonii DSM 6242	259564	Euryarchaeota	Methanomicrobia	Q12WI7	312	35215.5	5.4
412424	Radical SAM	Bacteria	Ruminococcus albus	697329	Firmicutes	Clostridia	E6UE53	293	31941.7	5.68
412425	Radical SAM	Bacteria	Lyngbya sp. PCC 8106	313612	Cyanobacteria		A0YP01	486	54280.8	5.91
412426	Radical SAM	Bacteria	Campylobacter gracilis	824	Proteobacteria	Epsilonproteobacteria	C8PHT9	275	30443.3	8.94
412427	Radical SAM	Bacteria	delta proteobacterium MLMS-1	262489	Proteobacteria	Deltaproteobacteria	Q1NMU0	424			x
412428	Radical SAM	Bacteria	Teredinibacter turnerae	2426	Proteobacteria	Gammaproteobacteria	C5BT94	498	54795.4	5.16
412429	Radical SAM	Bacteria	Geobacter uraniireducens	351604	Proteobacteria	Deltaproteobacteria	A5GAI4	288	31302.4	8.03
412430	Radical SAM	Bacteria	Rubrivivax benzoatilyticus	316997	Proteobacteria	Betaproteobacteria	F3LRJ1	524	56866.5	6.15
412431	Radical SAM	Bacteria	Methylacidiphilum infernorum	511746	Verrucomicrobia	Methylacidiphilae	B3DYY9	523	57860.4	8.46
412432	Radical SAM	Bacteria	Methylococcus capsulatus	414	Proteobacteria	Gammaproteobacteria	Q60CA5	522	56508.3	6.14
412433	Radical SAM	Bacteria	Microcoleus chthonoplastes	64178	Cyanobacteria		B4VJN9	427			x
412434	Radical SAM	Bacteria	Pelobacter propionicus DSM 2379	29543	Proteobacteria	Deltaproteobacteria	A1AUN5	289	31311.5	8.33
412435	Radical SAM	Bacteria	Rhizobium leguminosarum bv. trifolii	386	Proteobacteria	Alphaproteobacteria	A1Z1Y5	495	54367	6.85
412436	Radical SAM	Bacteria	Methylocella silvestris	199596	Proteobacteria	Alphaproteobacteria	B8EJ39	519	56766.4	5.68
412437	Radical SAM	Bacteria	Arcobacter sp. L	944547	Proteobacteria	Epsilonproteobacteria	G2HZ63	494	54879.8	5.75
412438	Radical SAM	Bacteria	Rhizobium etli	29449	Proteobacteria	Alphaproteobacteria	B3Q2N6	277			x
412439	Radical SAM	Bacteria	Desulfobacca acetoxidans DSM 11109	880072	Proteobacteria	Deltaproteobacteria	F2NG51	291	31964.9	8.13
412440	Radical SAM	Bacteria	Anaeromyxobacter sp. K	447217	Proteobacteria	Deltaproteobacteria	B4ULY8	482	51566	9.25
412441	Radical SAM	Archaea	Methanobrevibacter smithii ATCC 35061	2172	Euryarchaeota	Methanobacteria	B9AEE1	288	31867.7	6.01
412442	Radical SAM	Bacteria	Leptothrix cholodnii	34029	Proteobacteria	Betaproteobacteria	B1Y745	529	57572.2	5.68
412443	Radical SAM	Bacteria	Veillonella parvula ATCC 17745	29466	Firmicutes	Negativicutes	D1YN93	276	30834.4	6.55
412444	Radical SAM	Bacteria	Rhizobium etli	347834	Proteobacteria	Alphaproteobacteria	Q8KLB8	492	53635.2	6.2
412445	Radical SAM	Bacteria	Rhodobacter sphaeroides	1063	Proteobacteria	Alphaproteobacteria	B9KKU5	491	53045.3	5.96
412446	Radical SAM	Bacteria	Azorhizobium caulinodans	438753	Proteobacteria	Alphaproteobacteria	A8IIJ5	519	56031.9	5.93
412447	Radical SAM	Bacteria	Paenibacillus sabinae	365617	Firmicutes	Bacilli	E1ABV1	458	50484.6	6.48
412448	Radical SAM	Bacteria	Clostridium butyricum	1492	Firmicutes	Clostridia	C4IC68	888			x
412449	Radical SAM	Bacteria	Syntrophobacter fumaroxidans	119484	Proteobacteria	Deltaproteobacteria	A0LJP4	293	31806.8	8.41
412450	Radical SAM	Bacteria	Denitrovibrio acetiphilus DSM 12809	522772	Deferribacteres	Deferribacteres	D4H6W5	446	49592.9	6.6
412451	Radical SAM	Bacteria	Prevotella bryantii	752555	Bacteroidetes	Bacteroidia	D8DUM7	247			x
412452	Radical SAM	Archaea	Methanocella arvoryzae	1175445	Euryarchaeota	Methanomicrobia	Q0W760	292	32119.2	8.45
412453	Radical SAM	Archaea	Methanococcus vannielii	2187	Euryarchaeota	Methanococci	A6USF4	297	33729.1	7.15
412454	Radical SAM	Bacteria	Desulfonatronospira thiodismutans	488939	Proteobacteria	Deltaproteobacteria	D6SLD9	430			x
412455	Radical SAM	Bacteria	Rhizobium leguminosarum	384	Proteobacteria	Alphaproteobacteria	C6B4Y4	490	53567	6.39
412456	Radical SAM	Bacteria	Cyanothece sp. PCC 7822	497965	Cyanobacteria		E0UH09	483	53709.6	6.48
412457	Radical SAM	Bacteria	Desulfotomaculum kuznetsovii DSM 6115	58135	Firmicutes	Clostridia	F6CNC8	271	29844	9.66
412458	Radical SAM	Bacteria	Frankia sp. EAN1pec	298653	Actinobacteria	Actinobacteria	A8L2B4	655	69730.2	5.1
412459	Radical SAM	Archaea	Methanohalophilus mahii DSM 5219	2176	Euryarchaeota	Methanomicrobia	D5E7C7	322	36014.4	6.04
412460	Radical SAM	Bacteria	Clostridium beijerinckii	1520	Firmicutes	Clostridia	A6LR35	290	31795	7.57
412461	Radical SAM	Bacteria	Methylobacter tundripaludum	173365	Proteobacteria	Gammaproteobacteria	G3IZB1	496	54232.8	5.39
412462	Radical SAM	Bacteria	Desulfotomaculum carboxydivorans	327817	Firmicutes	Clostridia	F6B3H9	308	34405.6	7.95
412463	Radical SAM	Archaea	Methanoculleus marisnigri	2198	Euryarchaeota	Methanomicrobia	A3CT87	303	34286.5	6.02
412464	Radical SAM	Bacteria	Desulfitobacterium hafniense	138119	Firmicutes	Clostridia	Q24PI8	364			x
412465	Radical SAM	Bacteria	Desulfotomaculum reducens	349161	Firmicutes	Clostridia	A4J8B5	299	33380.8	8.89
412466	Radical SAM	Bacteria	Rhizobium etli CNPAF512	379	Proteobacteria	Alphaproteobacteria	F2AGG4	492	53636.1	6.04
412467	Radical SAM							519			x
412468	Radical SAM	Bacteria	Burkholderia phymatum	148447	Proteobacteria	Betaproteobacteria	B2JYC0	535	58409.6	6.27
412469	Radical SAM	Bacteria	Chlorobium luteolum DSM 273	319225	Chlorobi	Chlorobia	Q3B2N9	420			x
412470	Radical SAM	Archaea	Methanosalsum zhilinae DSM 4017	679901	Euryarchaeota	Methanomicrobia	F7XPI1	314	35255.5	6.23
412471	Radical SAM	Bacteria	Rhodopseudomonas palustris	395960	Proteobacteria	Alphaproteobacteria	B3QB57	518	56326.4	5.97
412472	Radical SAM	Bacteria	Treponema azotonutricium	545695	Spirochaetes	Spirochaetia	F5Y9P9	422			x
412473	Radical SAM	Bacteria	Klebsiella pneumoniae 342	507522	Proteobacteria	Gammaproteobacteria	B5XPF5	468	51004.2	6.02
412474	Radical SAM	Bacteria	Coraliomargarita akajimensis DSM 45221	583355	Verrucomicrobia	Opitutae	D5EQN3	428			x
412475	Radical SAM	Bacteria	Xanthobacter autotrophicus	78245	Proteobacteria	Alphaproteobacteria	A7IBH7	520	56733.6	5.91
412476	Radical SAM	Bacteria	Dysgonomonas gadei ATCC BAA-286	742766	Bacteroidetes	Bacteroidia	F5IU62	420			x
412477	Radical SAM	Bacteria	Prosthecochloris aestuarii DSM 271	290512	Chlorobi	Chlorobia	B4S9I2	424			x
412478	Radical SAM	Bacteria	Chlorobium ferrooxidans DSM 13031	377431	Chlorobi	Chlorobia	Q0YUY3	424			x
412479	Radical SAM	Bacteria	Clostridium kluyveri DSM 555	431943	Firmicutes	Clostridia	A5N910	448	50429.3	7.45
412480	Radical SAM	Bacteria	Dethiobacter alkaliphilus AHT 1	555088	Firmicutes	Clostridia	C0GKD1	418	46538.5	6.45
412481	Radical SAM	Archaea	Methanosarcina mazei	192952	Euryarchaeota	Methanomicrobia	Q8PYU4	328	36730.4	6.13
412482	Radical SAM	Bacteria	Frankia symbiont of Datisca glomerata	656024	Actinobacteria	Actinobacteria	F8B5P3	558	56555.6	5.39
412483	Radical SAM	Archaea	Methanobrevibacter smithii DSM 2374	521002	Euryarchaeota	Methanobacteria	D2ZQ66	288	31867.7	6.01
412484	Radical SAM	Bacteria	Desulfovibrio vulgaris	883	Proteobacteria	Deltaproteobacteria	B8DJB4	325	33515.6	7.68
412485	Radical SAM	Archaea	Methanopyrus kandleri AV19	190192	Euryarchaeota	Methanopyri	Q8TXS8	282			x
412486	Radical SAM	Bacteria	Desulfitobacterium hafniense	272564	Firmicutes	Clostridia	B8FZP2	280	30192	9.03
412487	Radical SAM	Bacteria	Thermocrinis albus DSM 14484	638303	Aquificae	Aquificae	D3SPG1	472	53219.1	6.43
412488	Radical SAM	Bacteria	Cylindrospermopsis raciborskii CS-505	533240	Cyanobacteria		D4TKJ5	477	53236.2	6.61
412489	Radical SAM	Bacteria	Desulfitobacterium hafniense Y51	138119	Firmicutes	Clostridia	Q24Q99	306	33688	8.58
412490	Radical SAM	Bacteria	Magnetococcus sp. MC-1	156889	Proteobacteria	Alphaproteobacteria	A0L6X4	464	50770.9	6.42
412491	Radical SAM	Bacteria	Rhodopseudomonas palustris BisB5	316057	Proteobacteria	Alphaproteobacteria	Q13C88	519	56226.1	6.08
412492	Radical SAM	Bacteria	Rhodobacter capsulatus SB 1003	272942	Proteobacteria	Alphaproteobacteria	D5ANH7	497	53666.8	5.63
412493	Radical SAM	Bacteria	Rhodopseudomonas palustris BisA53	316055	Proteobacteria	Alphaproteobacteria	Q07HX3	518	55884.7	6.12
412494	Radical SAM	Bacteria	Veillonella sp. oral taxon 158	671228	Firmicutes	Negativicutes	E4LE39	276	30806.3	6.55
412495	Radical SAM	Bacteria	Clostridium kluyveri DSM 555	431943	Firmicutes	Clostridia	A5N6Z7	423	47562.4	8.55
412496	Radical SAM	Bacteria	Rhodobacter sphaeroides ATCC 17025	349102	Proteobacteria	Alphaproteobacteria	A4WRX8	491	52868.3	5.68
412497	Radical SAM	Bacteria	Clostridium beijerinckii	1520	Firmicutes	Clostridia	Q7BKZ0	896			x
412498	Radical SAM	Bacteria	Roseiflexus castenholzii DSM 13941	383372	Chloroflexi	Chloroflexia	A7NR79	313	34361.7	8.78
412499	Radical SAM	Archaea	Methanosphaerula palustris E1-9c	521011	Euryarchaeota	Methanomicrobia	B8GJM8	303	33999.2	6.71
412500	Radical SAM	Bacteria	Paenibacillus fujiensis	208550	Firmicutes	Bacilli	B9X299	458	50751.9	6.48
412501	Radical SAM	Bacteria	Zymomonas mobilis subsp. mobilis NCIMB 11163	622759	Proteobacteria	Alphaproteobacteria	C8WE20	489
412502	Radical SAM	Bacteria	Pelobacter carbinolicus DSM 2380	338963	Proteobacteria	Deltaproteobacteria	Q3A2R0	297			x
412503	Radical SAM	Archaea	Methanothermobacter thermautotrophicus str. Delta H	187420	Euryarchaeota	Methanobacteria	O27899	288	32453.5	7.13
412504	Radical SAM	Bacteria	Desulfosporosinus sp. OT	913865	Firmicutes	Clostridia	G2FXR3	312	34613.3	6.5
412505	Radical SAM	Archaea	Methanospirillum hungatei JF-1	323259	Euryarchaeota	Methanomicrobia	Q2FLI5	298	33939.3	7.16
412506	Radical SAM	Bacteria	Dickeya dadantii 3937	198628	Proteobacteria	Gammaproteobacteria	E0SHZ3	465	50762.6	5.94
412507	Radical SAM	Bacteria	Treponema primitia ZAS-2	545694	Spirochaetes	Spirochaetia	F5YPB0	428			x
412508	Radical SAM	Bacteria	Cyanothece sp. PCC 7425	395961	Cyanobacteria		B8HWE0	495	55218.5	6.71
412509	Radical SAM	Bacteria	Rhodopseudomonas palustris HaA2	316058	Proteobacteria	Alphaproteobacteria	Q2J1J1	518	56161.1	5.89
412510	Radical SAM	Bacteria	Ethanoligenens harbinense YUAN-3	663278	Firmicutes	Clostridia	E6U878	907			x
412511	Radical SAM	Bacteria	delta proteobacterium MLMS-1	262489	Proteobacteria	Deltaproteobacteria	Q1NW55	424			x
412512	Radical SAM	Bacteria	Veillonella parvula DSM 2008	479436	Firmicutes	Negativicutes	D1BR62	276	30881.3	6.05
412513	Radical SAM	Bacteria	Polaromonas naphthalenivorans CJ2	365044	Proteobacteria	Betaproteobacteria	A1VML0	531	57728.5	5.48
412514	Radical SAM	Archaea	uncultured archaeon	115547			D1JAT1	304	34763.1	5.98
412515	Radical SAM	Bacteria	Desulfotomaculum acetoxidans DSM 771	485916	Firmicutes	Clostridia	C8W448	304	33931.5	8.77
412516	Radical SAM	Bacteria	Chlorobium chlorochromatii CaD3	340177	Chlorobi	Chlorobia	Q3AR63	423			x
412517	Radical SAM	Archaea	Methanothermus fervidus DSM 2088	523846	Euryarchaeota	Methanobacteria	E3GWP9	284			x
412518	Radical SAM	Archaea	Methanococcus aeolicus Nankai-3	419665	Euryarchaeota	Methanococci	A6UUJ9	318	36390.1	6.84
412519	Radical SAM	Bacteria	Rhodopseudomonas palustris CGA009	258594	Proteobacteria	Alphaproteobacteria	Q6N0X9	518	56352.4	5.97
412520	Radical SAM	Archaea	Methanococcus voltae A3	456320	Euryarchaeota	Methanococci	D7DSI7	297	33853.2	6.83
412521	Radical SAM	Bacteria	Ilyobacter polytropus DSM 2926	572544	Fusobacteria	Fusobacteriia	E3HAJ5	426	47853.1	6.36
412522	Radical SAM	Bacteria	Rhodomicrobium vannielii ATCC 17100	648757	Proteobacteria	Alphaproteobacteria	E3I4T9	297	31725.7	8.46
412523	Radical SAM	Bacteria	Beijerinckia indica subsp. indica ATCC 9039	395963	Proteobacteria	Alphaproteobacteria	B2IE25	527	57706.6	5.66
412524	Radical SAM	Bacteria	Cyanothece sp. CCY0110	391612	Cyanobacteria		A3IL23	491	54345.1	6.56
412525	Radical SAM	Bacteria	Paludibacter propionicigenes WB4	694427	Bacteroidetes	Bacteroidia	E4T4D4	424			x
412526	Radical SAM	Bacteria	Methylobacterium sp. 4-46	426117	Proteobacteria	Alphaproteobacteria	B0UBK8	498	54362.9	5.76
412527	Radical SAM	Bacteria	Caldicellulosiruptor kronotskyensis 2002	632348	Firmicutes	Clostridia	E4SGT3	266			x
412528	Radical SAM	Bacteria	Anabaena azollae, 'Nostoc azollae' 0708	551115	Cyanobacteria		D7E3U6	479	53126	6.39
412529	Radical SAM	Bacteria	Oscillatoria sp. PCC 6506	272129	Cyanobacteria			484
412530	Radical SAM	Bacteria	Synechococcus sp. JA-3-3Ab	321327	Cyanobacteria		Q2JTL3	478	53436.4	8.45
412531	Radical SAM	Archaea	Methanocaldococcus fervens	83171	Euryarchaeota	Methanococci	C7P9B4	299			x
412532	Radical SAM	Bacteria	Anaerotruncus colihominis DSM 17241	169435	Firmicutes	Clostridia	B0PE91	207			x
412533	Radical SAM	Archaea	Methanothermobacter marburgensis	145263	Euryarchaeota	Methanobacteria	D9PUZ6	288			x
412534	Radical SAM	Bacteria	Desulfovibrio africanus	690850	Proteobacteria	Deltaproteobacteria	F3YV05	445			x
412535	Radical SAM	Bacteria	Desulfovibrio africanus str. Walvis Bay	690850	Proteobacteria	Deltaproteobacteria	F3YWU7	291	30953.8	8.22
412536	Radical SAM	Bacteria	Alkaliphilus metalliredigens	208226	Firmicutes	Clostridia	A6TTX6	415	47042.6	6.31
412537	Radical SAM	Bacteria	Thiocystis violascens DSM 198	765911	Proteobacteria	Gammaproteobacteria	I3YAR0	503	54936.8	6.2
412538	Radical SAM	Bacteria	Rhizobium leguminosarum	387	Proteobacteria	Alphaproteobacteria	Q8GBU8	497	54396.1	7
412539	Radical SAM	Bacteria	Desulfovibrio vulgaris	881	Proteobacteria	Deltaproteobacteria	A1VI43	473			x
412540	Radical SAM	Bacteria	Crocosphaera watsonii	263511	Cyanobacteria		Q4C2Z1	490	54259.2	7
412541	Radical SAM	Bacteria	Halorhodospira halophila	1053	Proteobacteria	Gammaproteobacteria	Q588Z7	263			x
412542	Radical SAM	Bacteria	Desulfarculus baarsii DSM 2075	644282	Proteobacteria	Deltaproteobacteria	E1QE25	384			x
412543	Radical SAM	Environmental samples	uncultured Desulfobacterium sp.	201089	Proteobacteria	Deltaproteobacteria	E1Y8C8	424			x
412544	Radical SAM	Bacteria	Ruminococcus albus 8	246199	Firmicutes	Clostridia	E9SF62	291	31449	5.72
412545	Radical SAM	Archaea	Methanococcus maripaludis C5	402880	Euryarchaeota	Methanococci	A4FYD9	297	33770.1	6.4
412546	Radical SAM	Bacteria	Burkholderia sp. CCGE1002	640511	Proteobacteria	Betaproteobacteria	D5WN35	532	58860	6.71
412547	Radical SAM	Bacteria	Chlorobium phaeovibrioides DSM 265	290318	Chlorobi	Chlorobia	A4SFV3	420			x
412548	Radical SAM	Bacteria	Hyphomicrobium sp. MC1	717785	Proteobacteria	Alphaproteobacteria	F8JB82	519	56588.2	5.81
412549	Radical SAM	Bacteria	Calditerrivibrio nitroreducens DSM 19672	768670	Deferribacteres	Deferribacteres	E4TG34	295	33444	8.75
412550	Radical SAM	Bacteria	Desulfobulbus propionicus DSM 2032	577650	Proteobacteria	Deltaproteobacteria	E8RBV7	425			x
412551	Radical SAM	Bacteria	Methylosinus trichosporium	595536	Proteobacteria	Alphaproteobacteria	D5QKH0	519
412552	Radical SAM	Bacteria	Oscillochloris trichoides DG6	765420	Chloroflexi	Chloroflexia	E1I9R3	307	33883.9	7.52
412553	Radical SAM	Bacteria	Cupriavidus taiwanensis LMG 19424	977880	Proteobacteria	Betaproteobacteria	B2AIY9	523	57901.2	8.55
412554	Radical SAM	Bacteria	Desulfotomaculum ruminis DSM 2154	696281	Firmicutes	Clostridia	F6DLK8	313	34868.5	8.73
412555	Radical SAM	Bacteria	cyanobacterium endosymbiont of Rhopalodia gibba	309035	Cyanobacteria		A1KYJ3	483	53304.3	8.24
412556	Radical SAM							440			x
412557	Radical SAM	Bacteria	Clostridium pasteurianum DSM 525	1262449	Firmicutes	Clostridia	Q6J2L8	929	103097	6.12
412558	Radical SAM	Bacteria	Zymomonas mobilis subsp. mobilis ATCC 10988	555217	Proteobacteria	Alphaproteobacteria	F8DSC8	489	34109.6	8.25
412559	Radical SAM	Archaea	Methanosaeta thermophila PT	349307	Euryarchaeota	Methanomicrobia	A0B690	299	54277	6.83
412560	Radical SAM	Bacteria	Sinorhizobium medicae	366394	Proteobacteria	Alphaproteobacteria	A6UMF6	490	31596.6	8.08
412561	Radical SAM	Bacteria	Geobacter metallireducens	28232	Proteobacteria	Deltaproteobacteria	Q39XV1	290	57452	5.81
412562	Radical SAM	Bacteria	Herbaspirillum seropedicae SmR1	864073	Proteobacteria	Betaproteobacteria	R0EHS3,	525	57452	5.81
412563	Radical SAM	Bacteria	Wolinella succinogenes DSM 1740	273121	Proteobacteria	Epsilonproteobacteria	Q7MRF5	449	49671.3	7.22
412564	Radical SAM	Bacteria	Rhodopseudomonas palustris	1076	Proteobacteria	Alphaproteobacteria	Q20XZ1	518	56156.2	6.3
412565	Radical SAM	Bacteria	Rhodopseudomonas palustris CGA009	258594	Proteobacteria	Alphaproteobacteria	Q6N7A4	307			x
412566	Radical SAM	Archaea	Methanococcus maripaludis S2	267377	Euryarchaeota	Methanococci	Q6LZH0	297	33799
412567	Radical SAM	Bacteria	Burkholderia xenovorans LB400	36873, 266265	Proteobacteria	Betaproteobacteria	Q13N21	531	58004.7
412568	Radical SAM	Bacteria	Rhizobium leguminosarum	384	Proteobacteria	Alphaproteobacteria	P09825	162			x
412569	Radical SAM	Bacteria	Paenibacillus abekawaensis	244733	Firmicutes	Bacilli	B9X2B9	458	50840.4	6.92
412570	Radical SAM	Bacteria	Acetonema longum DSM 6540	1009370	Firmicutes	Negativicutes	F7NPZ3	299	32324.1	8.97
412571	Radical SAM	Bacteria	Desulfuromonas acetoxidans DSM 684	281689	Proteobacteria	Deltaproteobacteria	Q1K1F3	287	31258.3	7.61
412572	Radical SAM	Bacteria	Allochromatium vinosum DSM 180	572477	Proteobacteria	Gammaproteobacteria	D3RS02	500	54505.4	6.12
412573	Radical SAM	Bacteria	Spirochaeta thermophila DSM 6192	665571	Spirochaetes	Spirochaetia	E0RPC5	423			x
412574	Radical SAM	Archaea	Methanosaeta concilii GP6	990316	Euryarchaeota	Methanomicrobia	F4BYQ2	302	34409.9	7.11
412575	Radical SAM	Bacteria	Pseudomonas stutzeri DSM 4166	996285	Proteobacteria	Gammaproteobacteria	F2MZW2	504	54951.7	5.53
412576	Radical SAM	Bacteria	Heliobacterium modesticaldum Ice1	498761	Firmicutes	Clostridia	B0TAQ0	277	30016.7	8.97
412577	Radical SAM	Archaea	Methanoplanus petrolearius DSM 11571	679926	Euryarchaeota	Methanomicrobia	E1RJ30	302	34042.2	5.6
412578	Radical SAM	Bacteria	Desulfatibacillum alkenivorans AK-01	259354, 439235	Proteobacteria	Deltaproteobacteria	B8FAB7	424			x
412579	Radical SAM	Bacteria	Synechococcus sp. JA-2-3B'a(2-13)	321332	Cyanobacteria		Q2JP82	478	53376.4	8.44
412580	Radical SAM	Bacteria	Desulfovibrio salexigens DSM 2638	526222	Proteobacteria	Deltaproteobacteria	C6BX24	423			x
412581	Radical SAM	Archaea	Methanocaldococcus sp. FS406-22	644281	Euryarchaeota	Methanococci	D3S752	295	33958	8.83
412582	Radical SAM	Bacteria	Thermodesulfatator indicus DSM 15286	667014	Thermodesulfobacteria	Thermodesulfobacteria	F8ADV8	276			x
412583	Radical SAM	Bacteria	Rhizobium leguminosarum bv. viciae 3841	216596	Proteobacteria	Alphaproteobacteria	Q1M7V9	497	54204.1	7.26
412584	Radical SAM	Bacteria	Desulfovibrio sp. ND132	641491	Proteobacteria	Deltaproteobacteria	F0JD10	391			x
412585	Radical SAM	Bacteria	Desulfomicrobium baculatum DSM 4028	525897	Proteobacteria	Deltaproteobacteria	C7LPB8	418			x
412586	Radical SAM	Bacteria	Acetonema longum DSM 6540	1009370	Firmicutes	Negativicutes	F7NEX4	293	31371	8.25
412587	Radical SAM	Bacteria	Leptospirillum ferrodiazotrophum	412449	Nitrospirae	Nitrospira	C6HVB8	409			x
412588	Radical SAM	Bacteria	Desulfitobacterium hafniense DCB-2	272564	Firmicutes	Clostridia	B8G298	318	34903.4	8.43
412589	Radical SAM	Bacteria	Dehalococcoides ethenogenes 195	61435	Chloroflexi	Dehalococcoidia	Q3Z7D7	276	30116.9	7.54
412590	Radical SAM	Bacteria	Desulfovibrio aespoeensis Aspo-2	643562	Proteobacteria	Deltaproteobacteria	E6VSZ6	423			x
412591	Radical SAM	Bacteria	Rhizobium leguminosarum bv. trifolii	386	Proteobacteria	Alphaproteobacteria	A1Z1W7	490	53923.5	8.34
412592	Radical SAM	Bacteria	Paenibacillus durus	44251	Firmicutes	Bacilli	Q9AKT9	458	50530.7	6.65
412593	Radical SAM	Archaea	Methanobacterium sp. SWAN-1	868131	Euryarchaeota	Methanobacteria	F6D1V2	283	31457.7	6.76
412594	Radical SAM	Bacteria	Heliobacterium chlorum	2698	Firmicutes	Clostridia	Q53UA6	277	30039.7	7.14
412595	Radical SAM	Archaea	Methanococcus maripaludis X1	1053692	Euryarchaeota	Methanococci	G0H409	297	33745.1	6.68
412596	Radical SAM	Bacteria	Desulfovibrio fructosovorans JJ	596151	Proteobacteria	Deltaproteobacteria	E1JXA2	425			x
412597	Radical SAM	Bacteria	Frankia sp. EuIK1	47227	Actinobacteria	Actinobacteria (high G+C Gram-positive bacteria)	Q9Z5X8	658	70263.9	4.95
412598	Radical SAM	Bacteria	Cyanothece sp. PCC 8801	41431	Cyanobacteria		O09254	558	61328.8	6.54
412599	Radical SAM	Bacteria	Paenibacillus massiliensis	225917	Firmicutes	Bacilli	Q56JU5	473	51713.1	7.55
435526	Radical SAM	Bacteria	Crocosphaera watsonii	263511	Cyanobacteria			421			x
435527	Radical SAM	Bacteria	Phaeospirillum molischianum DSM 120	1150626	Proteobacteria	Alphaproteobacteria		490
435528	Radical SAM	Bacteria	Sinorhizobium meliloti CCNWSX0020	1107881	Proteobacteria	Alphaproteobacteria		494
435529	Radical SAM	Bacteria	Clostridium sp. DL-VIII	641107	Firmicutes	Clostridia		899			x
435530	Radical SAM	Bacteria	Mesorhizobium amorphae	71433	Proteobacteria	Alphaproteobacteria		493
435531	Radical SAM	Bacteria	Sinorhizobium fredii HH103	1117943	Proteobacteria	Alphaproteobacteria		493
435532	Radical SAM	Bacteria	Clostridium clariflavum DSM 19732	720554	Firmicutes	Clostridia		900
435533	Radical SAM	Bacteria	Desulfotomaculum gibsoniae DSM 7213	767817	Firmicutes	Clostridia		318
435534	Radical SAM	Bacteria	Brenneria sp. EniD312	598467	Proteobacteria	Gammaproteobacteria		466
435535	Radical SAM	Archaea	Methanosaeta harundinacea 6Ac	1110509	Euryarchaeota	Methanomicrobia		305
435536	Radical SAM	Bacteria	Bradyrhizobium sp. ORS285	115808	Proteobacteria	Alphaproteobacteria		520
435537	Radical SAM	Bacteria	Fischerella sp. JSC-11	741277	Cyanobacteria			482
435538	Radical SAM	Bacteria	Campylobacter sp. 10_1_50	665939	Proteobacteria	Epsilonproteobacteria		275
435539	Radical SAM	Bacteria	Rhodospirillum photometricum DSM 122	1150469	Proteobacteria	Alphaproteobacteria		500
435540	Radical SAM	Bacteria	Bradyrhizobium sp. STM 3809	551936	Proteobacteria	Alphaproteobacteria		520
435541	Radical SAM	Bacteria	Azospirillum lipoferum 4B	862719	Proteobacteria	Alphaproteobacteria		520
435542	Radical SAM	Bacteria	Klebsiella oxytoca 10-5250	883125	Proteobacteria	Gammaproteobacteria		468
435543	Radical SAM	Bacteria	Bradyrhizobium sp. WSM471	319017	Proteobacteria	Alphaproteobacteria		517
435544	Radical SAM	Bacteria	Paenibacillus sp. HPL-003	985665	Firmicutes	Bacilli		499
435545	Radical SAM	Bacteria	Bradyrhizobium sp. STM 3843	551947	Proteobacteria	Alphaproteobacteria		520
435546	Radical SAM	Bacteria	Paenibacillus sp. Aloe-11	1050222	Firmicutes	Bacilli		489
435547	Radical SAM	Bacteria	Clostridium clariflavum DSM 19732	720554	Firmicutes	Clostridia		570
435548	Radical SAM	Bacteria	Azoarcus sp. KH32C	748247	Proteobacteria	Betaproteobacteria		504
435549	Radical SAM	Bacteria	Acetobacterium woodii DSM 1030	931626	Firmicutes	Clostridia		906			x
435550	Radical SAM	Bacteria	Rahnella aquatilis ATCC 33071	34038	Proteobacteria	Gammaproteobacteria		464
435551	Radical SAM	Bacteria	Thiorhodovibrio sp. 970	631362	Proteobacteria	Gammaproteobacteria		501
435552	Radical SAM	Bacteria	Ectothiorhodospira sp. PHS-1	519989	Proteobacteria	Gammaproteobacteria		505
435553	Radical SAM	Bacteria	Rahnella aquatilis HX2	1151116	Proteobacteria	Gammaproteobacteria		464
435554	Radical SAM	Bacteria	Burkholderiales bacterium JOSHI_001	864051	Proteobacteria	Betaproteobacteria		528
435555	Radical SAM	Bacteria	Klebsiella oxytoca 10-5242	883117	Proteobacteria	Gammaproteobacteria		468
435556	Radical SAM	Archaea	Methanoplanus limicola DSM 2279	937775	Euryarchaeota	Methanomicrobia		298
435557	Radical SAM	Bacteria	Azospirillum brasilense	1064539	Proteobacteria	Alphaproteobacteria		518
435558	Radical SAM	Bacteria	Azoarcus sp. KH32C	748247	Proteobacteria	Betaproteobacteria		521
435559	Radical SAM	Bacteria	Pseudomonas putida	303	Proteobacteria	Gammaproteobacteria		485
435560	Radical SAM	Bacteria	Azospira oryzae	146939	Proteobacteria	Betaproteobacteria		507
435561	Radical SAM	Bacteria	Holophaga foetida DSM 6591	903818	Acidobacteria	Holophagae		428			x
435562	Radical SAM	Archaea	Methanolinea tarda NOBI-1	882090	Euryarchaeota	Methanomicrobia		297
435563	Radical SAM	Bacteria	Bradyrhizobium sp. ORS375	566679	Proteobacteria	Alphaproteobacteria		520
435564	Radical SAM	Bacteria	Bradyrhizobium japonicum USDA 6	1037409	Proteobacteria	Alphaproteobacteria		527

## Sheet: Table 2
Supplementary Table 2. Selection of 28 NifB that cover all diazotrophic groups in the phylogeny.
Entry (Uniprot)	Entry name	Organism	Type of life	Class	Organism ID	Gene names	Status	Length	Cross-reference (Pfam)
P46044	NIFB_FRAAL	Frankia alni	Bacteria	Actinobacteria	1859	nifB	reviewed	510	PF02579;PF04055
P11067	NIFB_AZOVI	Azotobacter vinelandii	Bacteria	Gammaproteobacteria	354	nifB	reviewed	502	PF02579;PF04055
P10390	NIFB_KLEPN	Klebsiella pneumoniae	Bacteria	Gammaproteobacteria	573	nifB	reviewed	468	PF02579;PF04055
P17434	NIFB_RHOCA	Rhodobacter capsulatus	Bacteria	Alphaproteobacteria	1061	nifB	reviewed	452	PF02579;PF04055
A0A0H3J6H8	A0A0H3J6H8_CLOPA	Clostridium pasteurianum	Bacteria	Firmicutes	1262449	nifB	unreviewed	929	PF02579;PF00148;PF04055
A7NR79	A7NR79_ROSCS	Roseiflexus castenholzii	Bacteria	Chloroflexi	383372	Rcas_4042	unreviewed	313	PF04055
A1K2T5	A1K2T5_AZOSB	Azoarcus sp	Bacteria	Betaproteobacteria	62928	nifB	unreviewed	498	PF02579;PF04055
K7WZP9	K7WZP9_9NOST	Anabaena sp	Bacteria	Cyanobacteria	46234	nifB	unreviewed	479	PF02579;PF04055
D3SPG1	D3SPG1_THEAH	Thermocrinis albus	Bacteria	Aquificae	638303	Thal_0413	unreviewed	472	PF02579;PF04055
D5V3N9	D5V3N9_ARCNC	Arcobacter nitrofigilis	Bacteria	Epsilonproteobacteria	572480	Arnit_0080	unreviewed	482	PF02579;PF04055
G7DEY1	G7DEY1_BRAJP	Bradyrhizobium japonicum	Bacteria	Alphaproteobacteria	1037409	nifB	unreviewed	527	PF02579;PF04055
B4U920	B4U920_HYDS0	Hydrogenobaculum sp	Bacteria	Aquificae	380749	HY04AAS1_0944	unreviewed	469	PF02579;PF04055
F5IU62	F5IU62_9PORP	Dysgonomonas gadei	Bacteria	Bacteroidetes	742766	HMPREF9455_00629	unreviewed	420	PF02579;PF04055
Q20XZ1	Q20XZ1_RHOPB	Rhodopseudomonas palustris	Bacteria	Alphaproteobacteria	316056	RPC_4472	unreviewed	518	PF02579;PF04055
Q97MD9	Q97MD9_CLOAB	Clostridium acetobutylicum	Bacteria	Firmicutes	272562	CA_C0259	unreviewed	882	PF02579;PF00148;PF04055
Q0YUY3	Q0YUY3_9CHLB	Chlorobium ferrooxidans	Bacteria	Chlorobi	377431	CferDRAFT_1914	unreviewed	424	PF02579;PF04055
D5VRM1	D5VRM1_METIM	Methanocaldococcus infernus	Archaea	Euryarchaeota	573063	nifB Metin_0554	reviewed	302	PF04055
O09254	O09254_CYAP8	Cyanothece sp	Bacteria	Cyanobacteria	41431	nifB	unreviewed	558	PF02579;PF04055
Q93JV6	Q93JV6_PSEST	Pseudomonas stutzeri	Bacteria	Gammaproteobacteria	316	nifB	unreviewed	504	PF02579;PF04055
D2ZQ66	D2ZQ66_METSM	Methanobrevibacter smithii	Archaea	Euryarchaeota	521002	METSMIF1_02993	unreviewed	288	PF04055
O27899	O27899_METTH	Methanothermobacter thermautotrophicus	Archaea	Euryarchaeota	187420	MTH_1871	unreviewed	288	PF04055
N6VZV3	N6VZV3_9EURY	Methanocaldococcus villosus	Archaea	Euryarchaeota	1069083	J422_01388	unreviewed	295	PF04055
A5N1T7	A5N1T7_CLOK5	Clostridium kluyveri	Bacteria	Firmicutes	431943	nifB	unreviewed	890	PF02579;PF00148;PF04055
E4T4D4	E4T4D4_PALPW	Paludibacter propionicigenes	Bacteria	Bacteroidetes	694427	Palpr_1432	unreviewed	424	PF02579;PF04055
B3QQ19	B3QQ19_CHLP8	Chlorobaculum parvum	Bacteria	Chlorobi	517417	Cpar_1626	unreviewed	424	PF02579;PF04055
Q2RVQ0	Q2RVQ0_RHORT	Rhodospirillum rubrum	Bacteria	Alphaproteobacteria	269796	Rru_A0994	reviewed	503	PF02579;PF04055
Q8KC85	Q8KC85_CHLTE	Chlorobium tepidum	Bacteria	Chlorobi	194439	nifB CT1540	reviewed	424	PF02579;PF04055
Q3Z7D7	Q3Z7D7_DEHM1	Dehalococcoides mccartyi	Bacteria	Chloroflexi	243164	DET1148	unreviewed	276	PF04055

## Sheet: Table 3
Supplementary Table 3. NifBCt peptide fingerprint and fragmentation.
Match to: gi|499235665 Score: 678 Expect: 4e-061
Nominal mass (Mr): 47505; Calculated pI value: 5.77
Taxonomy: Chlorobaculum tepidum
Links to retrieve other entries containing this sequence from NCBI Entrez:
gi|21674359 from Chlorobium tepidum TLS
Fixed modifications: Carbamidomethyl (C)
Variable modifications: Oxidation (M)
Cleavage by Trypsin: cuts C-term side of KR unless next residue is P
Sequence Coverage: 60%
Matched peptides shown in Bold Red
1 MTLNIKNHPC FNDSSRHTYG RIHLPVAPKC NIQCNYCNRK FDCMNENRPG
51 ITSKVLSPRQ ALYYLDNALK LSPNISVVGI AGPGDPFANP EETMETLRLV
101 REKYPEMLLC VATNGLDMLP YIEELAELQV SHVTLTINAI DPEIGQEIYA
151 WVRYQKKMYR DRQAAELLLE NQLAALQKLK RYGVTAKVNS IIIPGVNDQH
201 VIEVARQVAS MGADILNALP YYNTTETVFE NIPEPDPMMV RKIQEEAGKL
251 LPQMKHCARC RADAVGIIGE INSDEMMAKL AEAALMPKNP DEHRPYIAVA
301 SLEGVLINQH LGEADRFLVY ALDEEKKSCT LVDSRQAPPP GGGKLRWEAL
351 AAKLSDCRAV LVNSAGDSPQ SVLKASGIDV MSIEGVIEEA VYGVFTGQNL
401 KHLMKSSQIH ACKTSCGGDG NGCD
Start - End Observed Mr(expt) Mr(calc) ppm Miss Sequence
7 - 16 1233.4348 1232.4275 1232.4993 -58 0 K.NHPCFNDSSR.H (No match)
7 - 16 1233.4348 1232.4275 1232.4993 -58 0 K.NHPCFNDSSR.H (Ions score 72)
30 - 39 1401.4636 1400.4563 1400.5384 -59 0 K.CNIQCNYCNR.K (No match)
40 - 54 1796.7378 1795.7305 1795.8345 -58 1 R.KFDCMNENRPGITSK.V (No match)
40 - 54 1812.7292 1811.7219 1811.8294 -59 1 R.KFDCMNENRPGITSK.V Oxidation (M) (No match)
41 - 54 1668.6451 1667.6378 1667.7396 -61 0 K.FDCMNENRPGITSK.V (No match)
41 - 54 1684.6475 1683.6402 1683.7345 -56 0 K.FDCMNENRPGITSK.V Oxidation (M) (No match)
60 - 70 1311.6100 1310.6027 1310.6870 -64 0 R.QALYYLDNALK.L (No match)
60 - 70 1311.6100 1310.6027 1310.6870 -64 0 R.QALYYLDNALK.L (Ions score 82)
71 - 98 2911.3081 2910.3008 2910.4433 -49 0 K.LSPNISVVGIAGPGDPFANPEETMETLR.L (No match)
71 - 98 2911.3081 2910.3008 2910.4433 -49 0 K.LSPNISVVGIAGPGDPFANPEETMETLR.L (Ions score 149)
71 - 98 2927.3074 2926.3001 2926.4382 -47 0 K.LSPNISVVGIAGPGDPFANPEETMETLR.L Oxidation (M) (No match)
161 - 178 2023.9989 2022.9916 2023.1061 -57 1 R.DRQAAELLLENQLAALQK.L (No match)
163 - 178 1752.8719 1751.8646 1751.9781 -65 0 R.QAAELLLENQLAALQK.L (No match)
188 - 206 2073.0249 2072.0176 2072.1378 -58 0 K.VNSIIIPGVNDQHVIEVAR.Q (No match)
188 - 206 2073.0249 2072.0176 2072.1378 -58 0 K.VNSIIIPGVNDQHVIEVAR.Q (Ions score 151)
207 - 241 3926.7092 3925.7019 3925.8576 -40 0 R.QVASMGADILNALPYYNTTETVFENIPEPDPMMVR.K (No match)
207 - 241 3942.7322 3941.7249 3941.8525 -32 0 R.QVASMGADILNALPYYNTTETVFENIPEPDPMMVR.K Oxidation (M) (No match)
207 - 241 3958.7478 3957.7405 3957.8475 -27 0 R.QVASMGADILNALPYYNTTETVFENIPEPDPMMVR.K 2 Oxidation (M) (No match)
260 - 279 2179.8953 2178.8880 2179.0071 -55 1 R.CRADAVGIIGEINSDEMMAK.L (No match)
260 - 279 2195.8987 2194.8914 2195.0020 -50 1 R.CRADAVGIIGEINSDEMMAK.L Oxidation (M) (No match)
260 - 279 2211.8782 2210.8709 2210.9970 -57 1 R.CRADAVGIIGEINSDEMMAK.L 2 Oxidation (M) (No match)
262 - 279 1863.7662 1862.7589 1862.8754 -63 0 R.ADAVGIIGEINSDEMMAK.L (No match)
289 - 316 3113.4348 3112.4275 3112.5690 -45 0 K.NPDEHRPYIAVASLEGVLINQHLGEADR.F (No match)
317 - 326 1226.5624 1225.5551 1225.6230 -55 0 R.FLVYALDEEK.K (No match)
317 - 327 1354.6445 1353.6372 1353.7180 -60 1 R.FLVYALDEEKK.S (No match)
345 - 353 1057.5461 1056.5388 1056.6080 -65 1 K.LRWEALAAK.L (No match)
345 - 353 1057.5461 1056.5388 1056.6080 -65 1 K.LRWEALAAK.L (Ions score 41)
359 - 374 1584.7603 1583.7530 1583.8519 -62 0 R.AVLVNSAGDSPQSVLK.A (No match)
375 - 401 2826.2815 2825.2742 2825.4157 -50 0 K.ASGIDVMSIEGVIEEAVYGVFTGQNLK.H (No match)
375 - 401 2842.2781 2841.2708 2841.4106 -49 0 K.ASGIDVMSIEGVIEEAVYGVFTGQNLK.H Oxidation (M) (No match)
Analysis performed in CAI de genómica y Proteómica, Faculta de Farmacia, Universidad Complutense de Madrid (Spain)

## Sheet: Table 4
Supplementary Table 4. Strains and plasmids used in this work.
Klebsiella oxytoca strains	Genotype	Reference
UN	wild type	MacNeil et al., 1978
UN1217	nifN::mu	MacNeil et al., 1978
UC9	ΔnifB	Zhao et al., 2007
UC16	ΔnifB, gst-nifB	Zhao et al., 2007
UC28	ΔnifB, gst-nifB-DC	This work
Azotobacter vinelandii strains
DJ	wild-type	Professor Dean, Virginia Tech
UW140	ΔnifB	Hernadez et al., 2007
UW418	ΔnifB, nifBMi	This work
UW422	ΔnifB, nifBCt	This work
Plasmids
pGEX-4T-3		GE Healthcare
pRHB233	Ptac::gst-nifBKo	Zhao et al., 2007
pRHB554	Ptac::gst-nifB-DC
pRHB557	PnifH::his-nifBCt	Wilcoxen et al., 2016
pRHB558	PnifH::his-nifBMi	This work
pRSFIscMetKDuet-1	E. coli K12 Isc and metK genes	Dr. Juan Fontecilla, IBS
References
MacNeil T, MacNeil D, Roberts GP, Supiano MA, Brill WJ. 1978. J Bacteriol 136: 253-66
Hernandez JA, Igarashi RY, Soboh B, Curatti L, Dean DR, et al. 2007. Mol. Microbiol. 63: 177-92
Wilcoxen J, Arragain S, Scandurra AA, Jimenez-Vicente E, Echavarri-Erasun C, et al. 2016. J. Am. Chem. Soc. 138: 7468-71
Zhao D, Curatti L, Rubio LM. 2007. J. Biol. Chem. 282: 37016-25
